# Supplementary material for: Removal of a Horizontally Displaced Dental Implant below the Mandibular Canal
Source: Hindawi journal article supplement (doi:10.1155/2023/6663874), 2023-01-01
Supplement: f1 [file 6663874.f1.pdf]

R

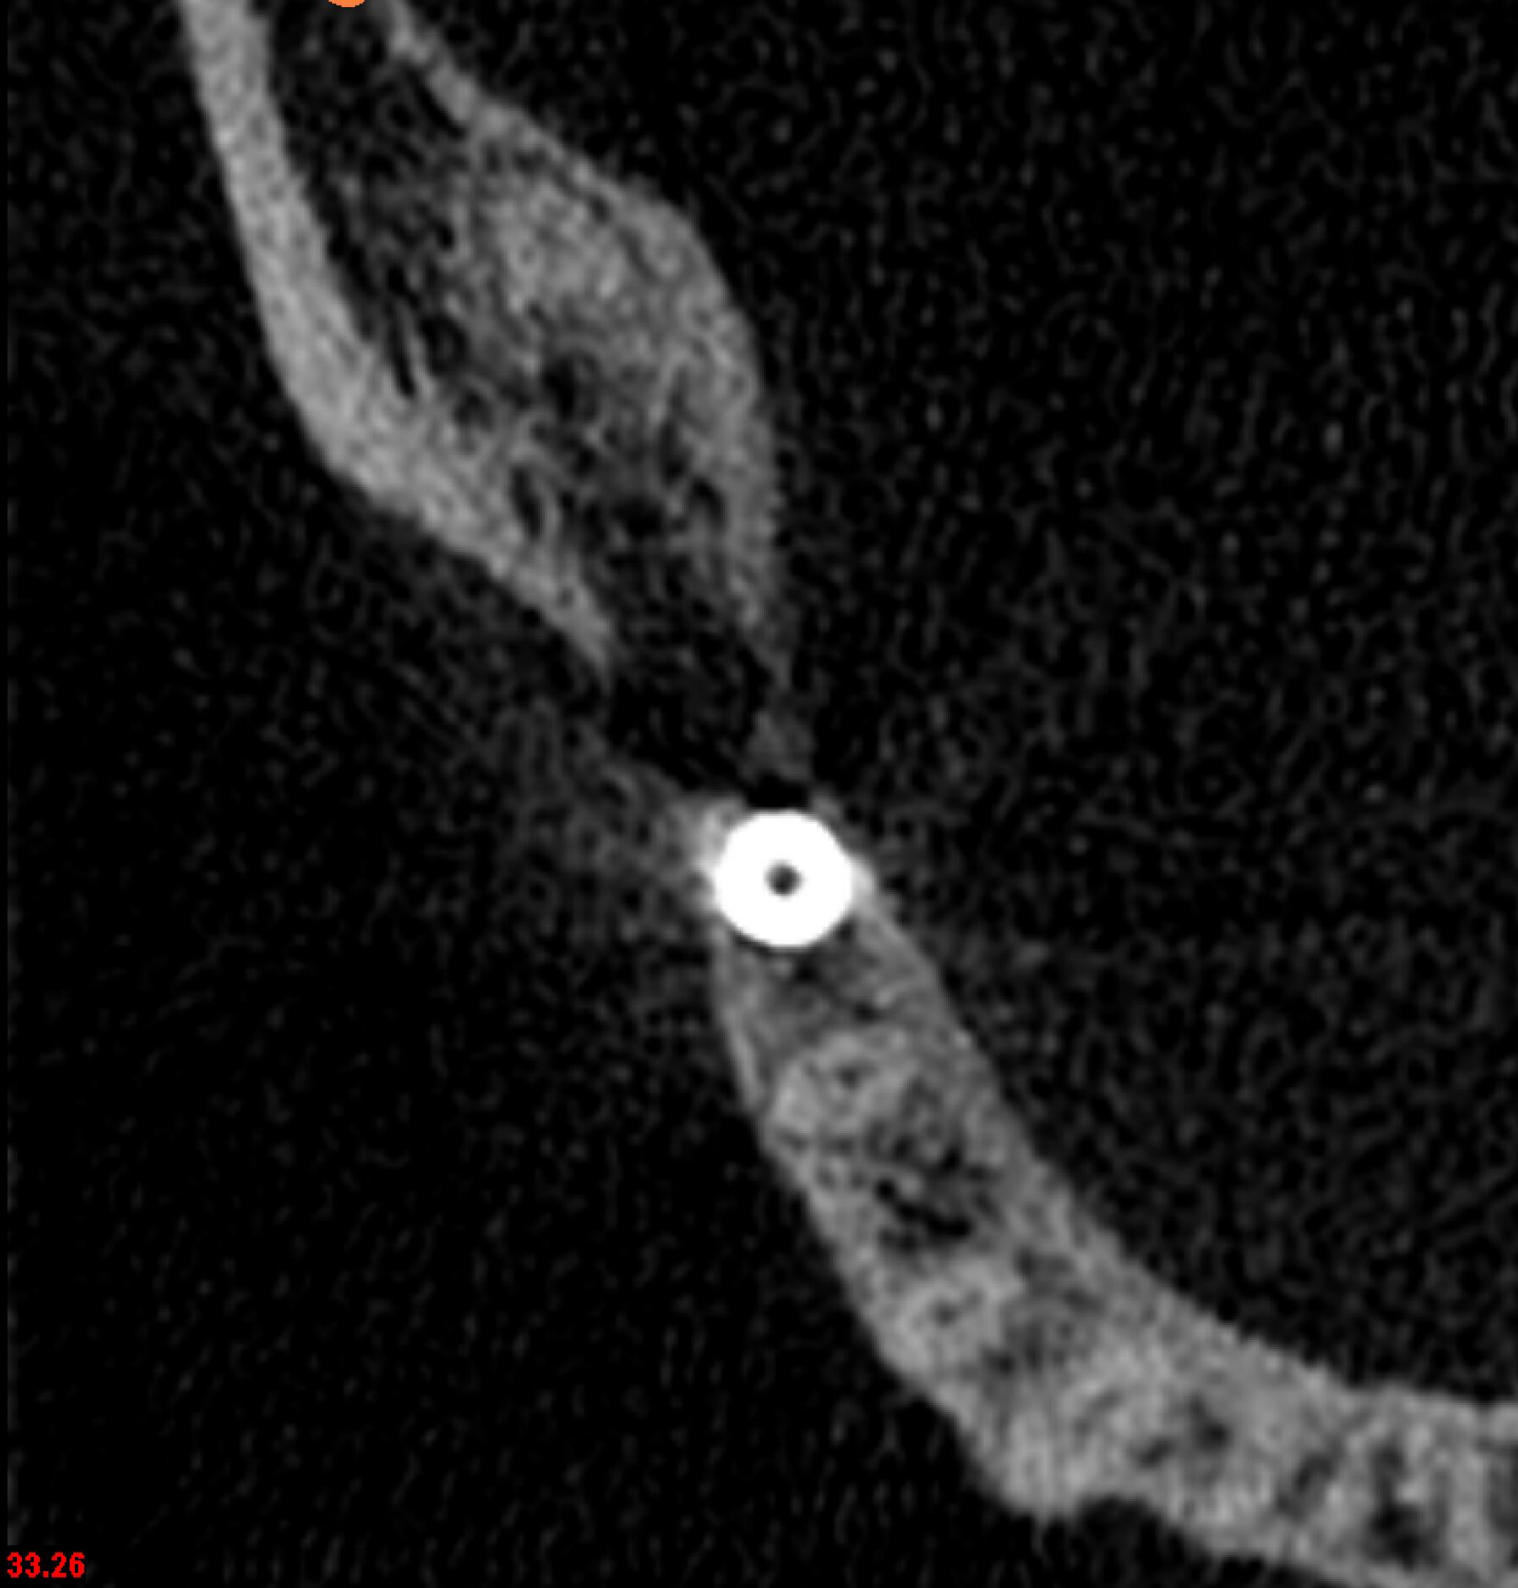

CT Axial: 33.26

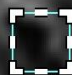

Area: 4.06mm<sup>2</sup>  
Mean: 481.18  
Std.Dev.: 298.16

R

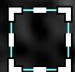

Area: 4.06mm<sup>2</sup>  
Mean: 304.75  
Std. Dev.: 199.95

CT Axial: 33.26

R

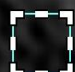

Area: 4.06mm<sup>2</sup>  
Mean: 293.74  
Std.Dev.: 160.52

R

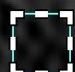

Area: 4.06mm<sup>2</sup>  
Mean: 282.49  
Std.Dev.: 170.59

CT Axial: 32.87

R

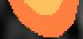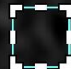

Area: 4.06mm<sup>2</sup>  
Mean: 275.01  
Std.Dev.: 129.77

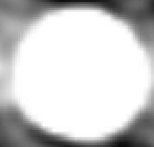

R

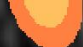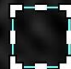

Area: 4.06mm<sup>2</sup>  
Mean: 271.44  
Std.Dev.: 107.22

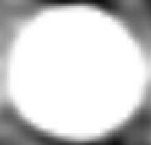

CT Axial: 31.91

R

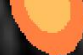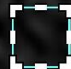

Area: 4.06mm<sup>2</sup>  
Mean: 263.45  
Std.Dev.: 117.16

CT Axial: 31.71



R

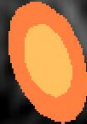

Area: 4.06mm<sup>2</sup>  
Mean: 265.76  
Std.Dev.: 136.32

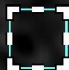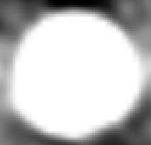

CT Axial: 29.97

R

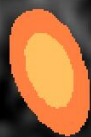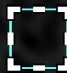

Area: 4.06mm<sup>2</sup>  
Mean: 257.95  
Std.Dev.: 111.24

CT Axial: 29.59

R

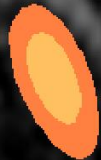

Area: 4.06mm2  
Mean: 230.25  
Std.Dev.: 125.95

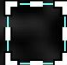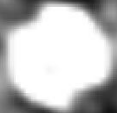

CT Axial: 28.04

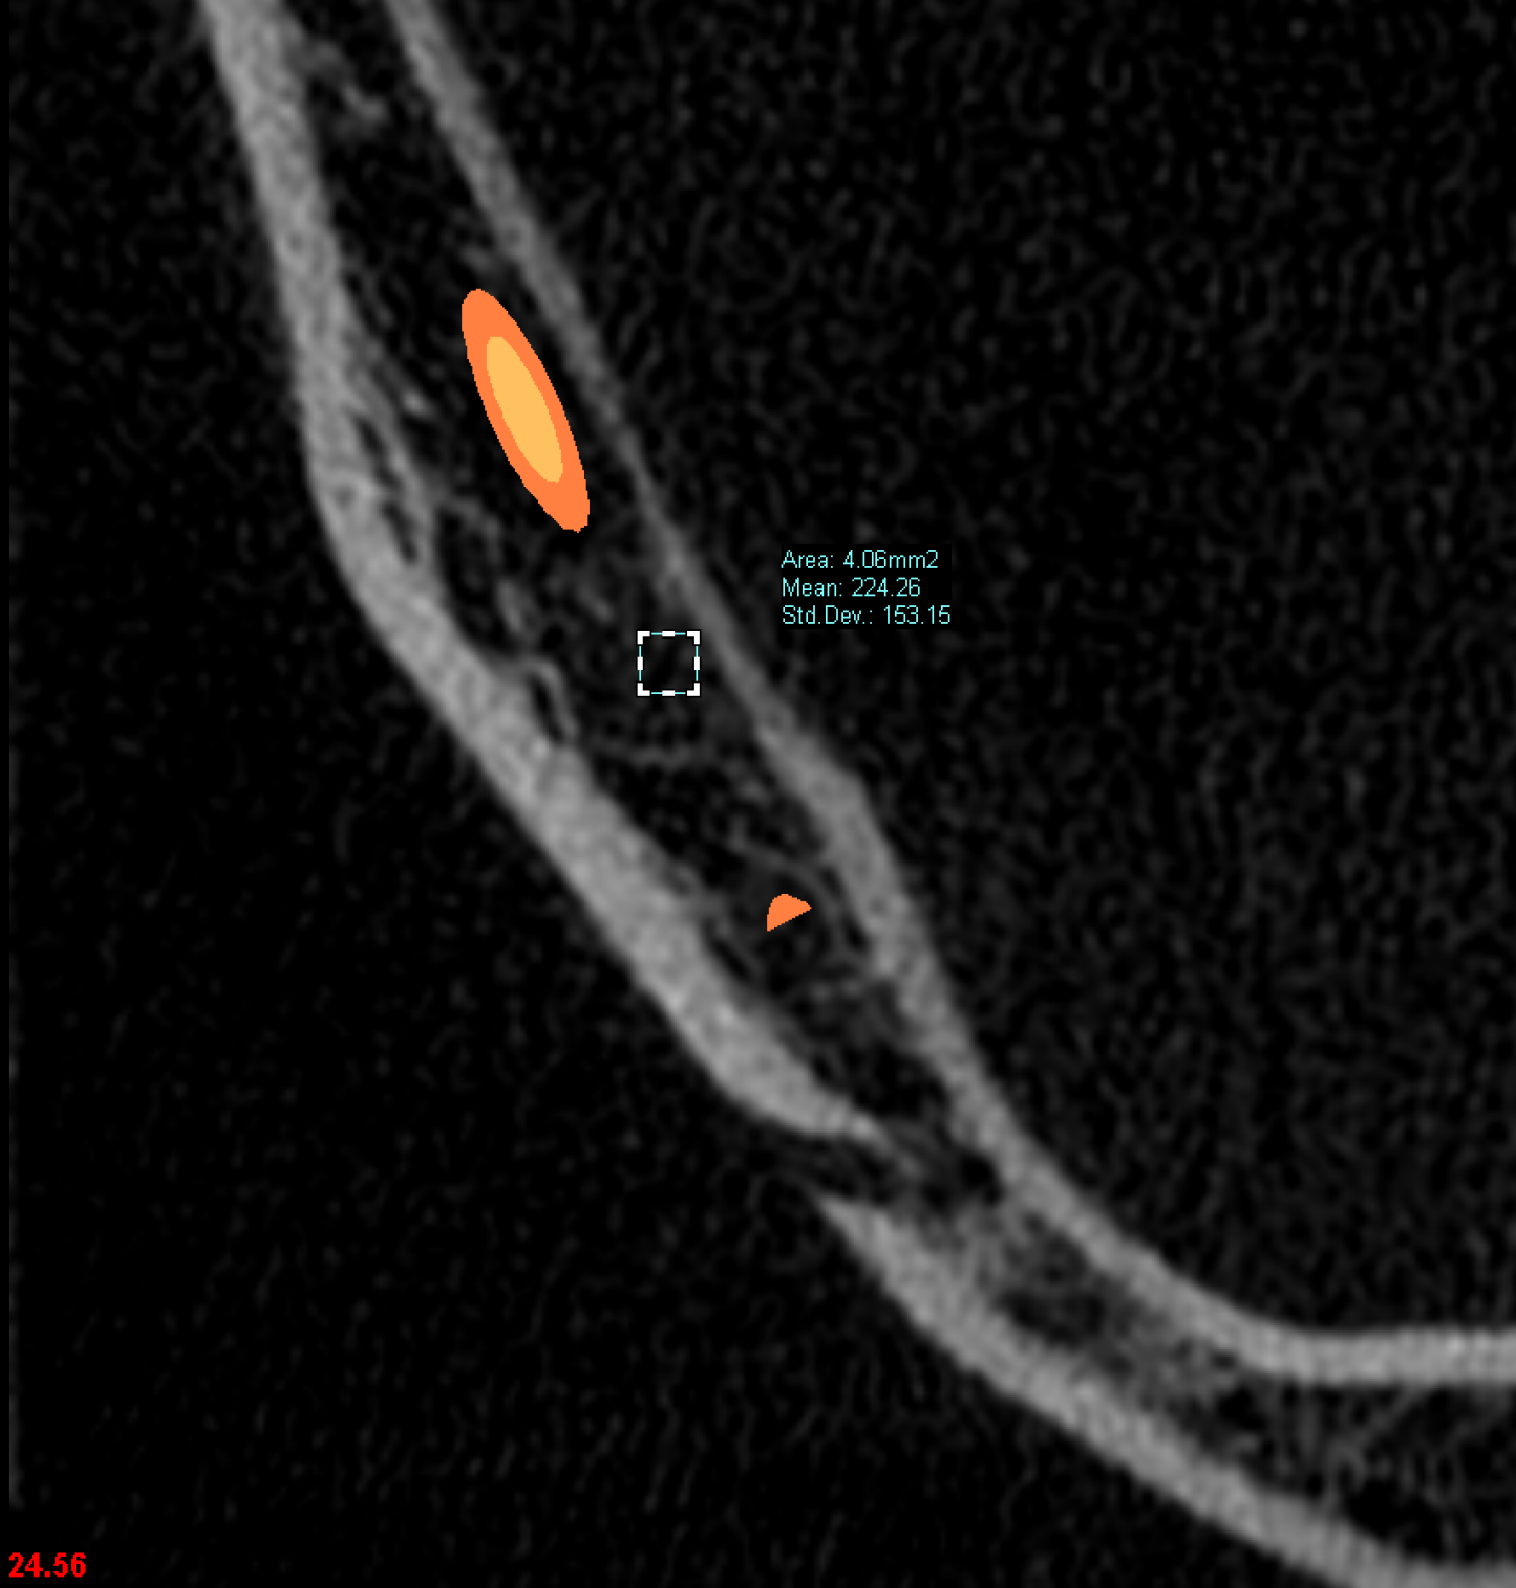

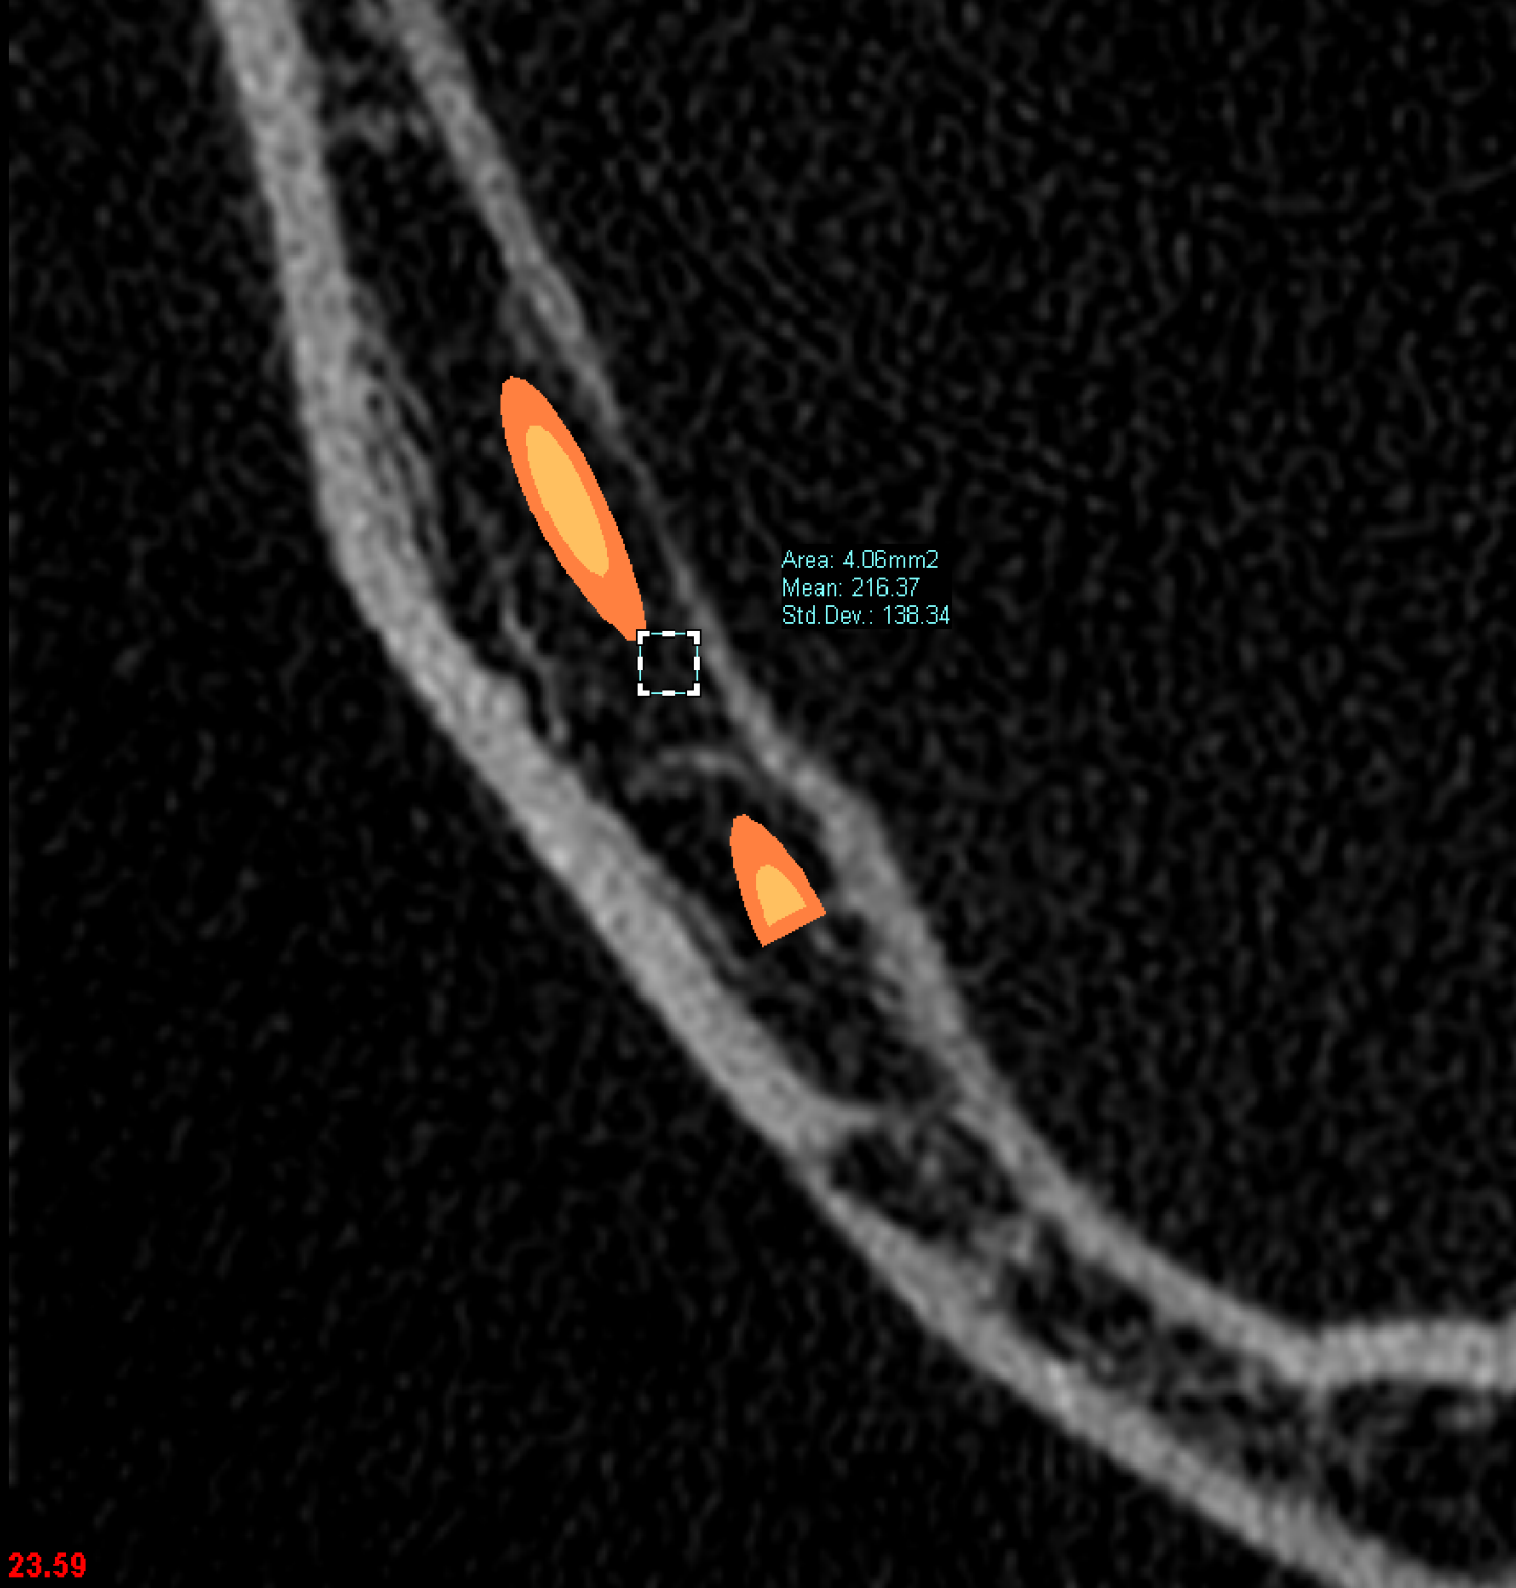

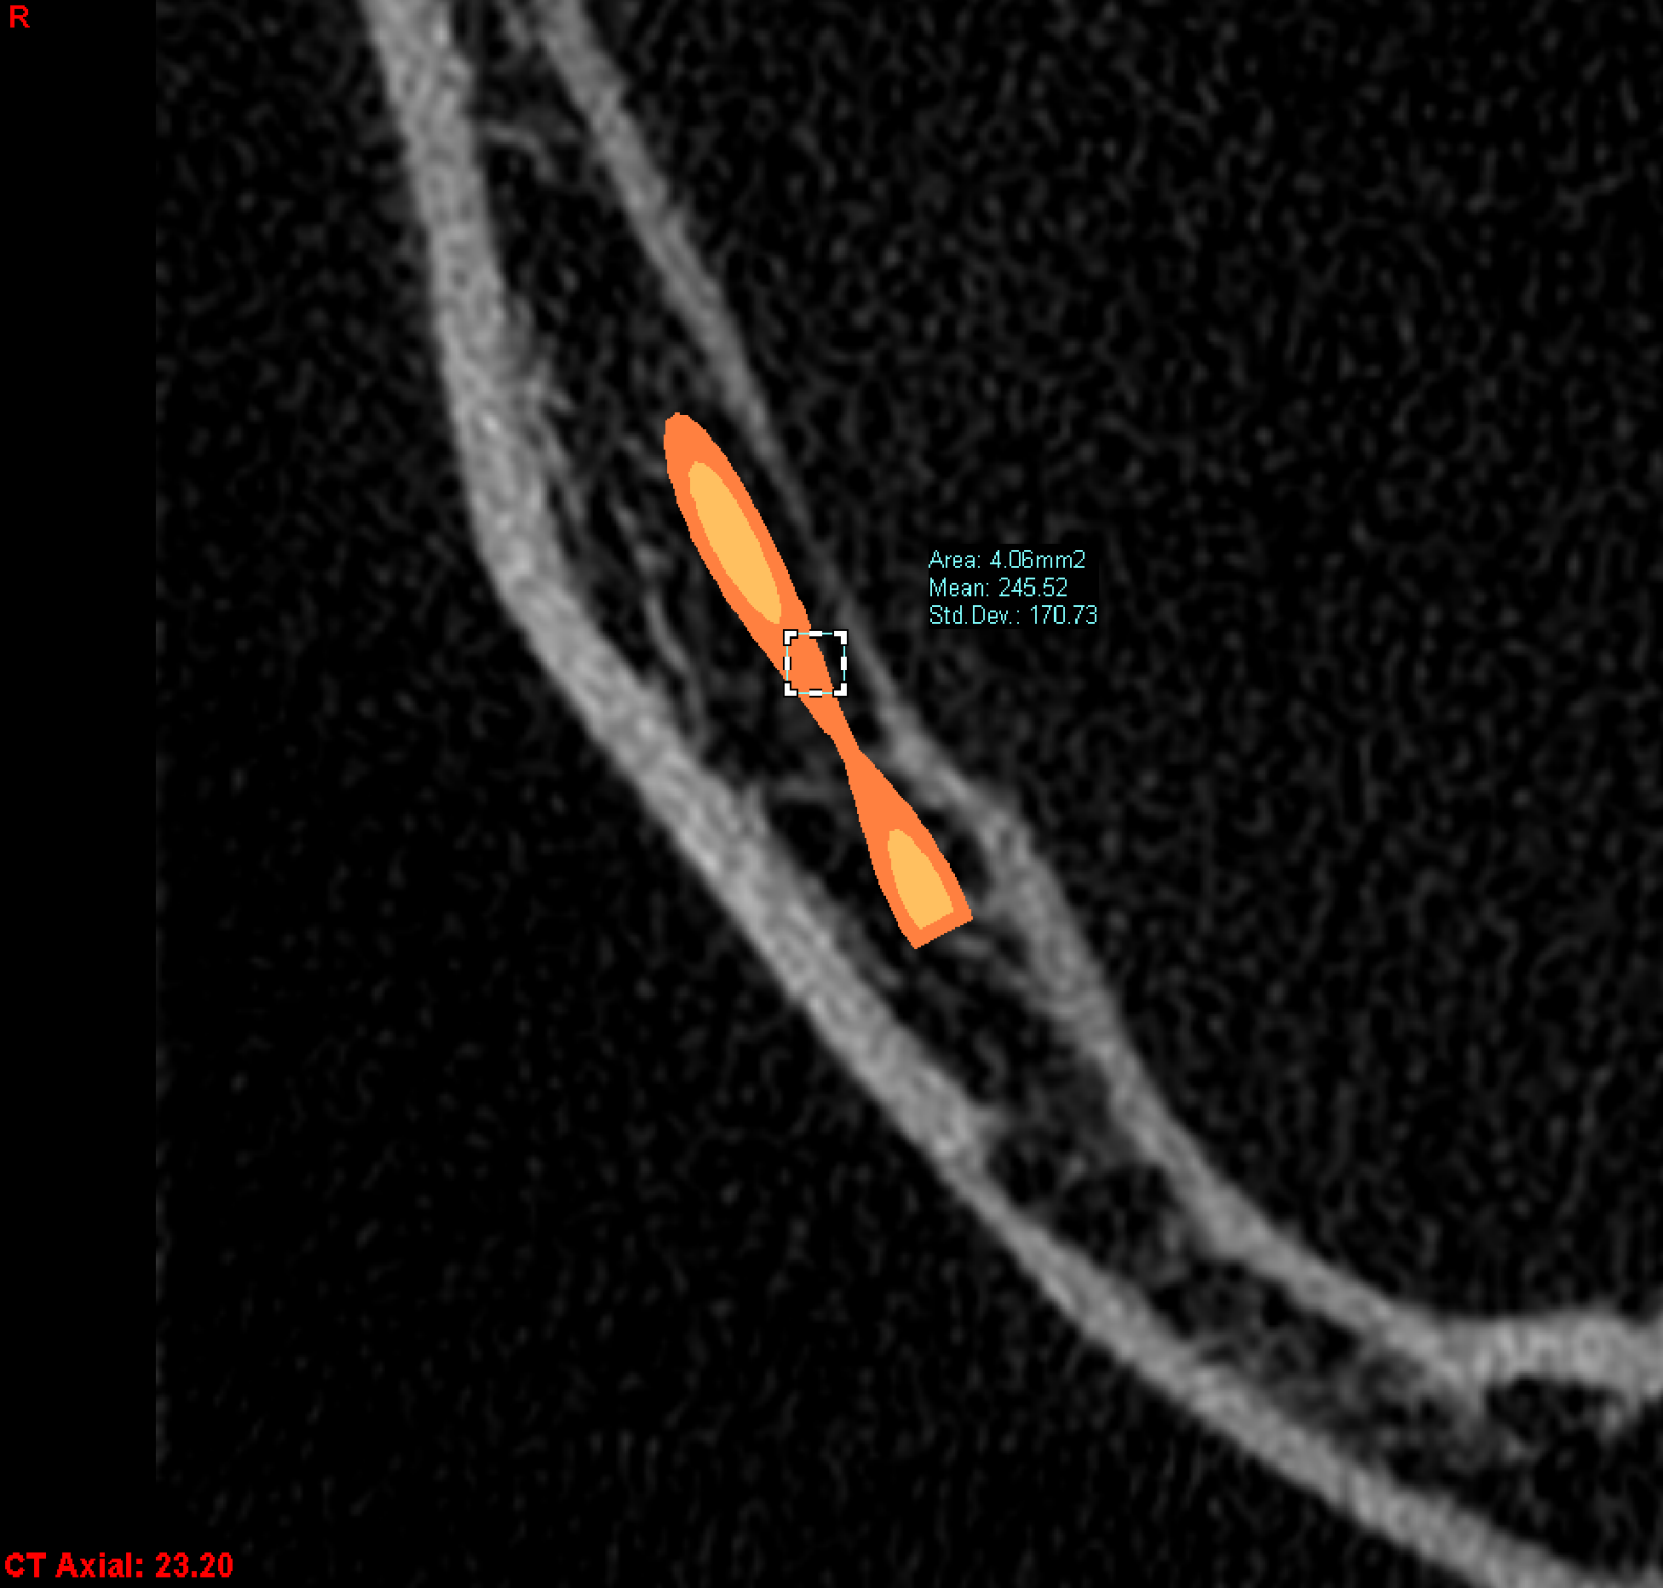

Area: 4.06mm<sup>2</sup>  
Mean: 245.52  
Std.Dev.: 170.73

The image shows an axial CT scan of a body part, likely a lung. A segmented lesion is visible, colored in shades of orange and yellow. A white dashed box highlights a specific region within the lesion. The background is dark, and the surrounding anatomical structures are shown in light gray.

R

Area: 4.06mm<sup>2</sup>  
Mean: 209.52  
Std.Dev.: 120.96

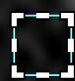

CT Axial: 22.62



Area: 4.06mm<sup>2</sup>  
Mean: 121.61  
Std.Dev.: 149.20

This is an axial CT scan of a vessel. A white box highlights a region of interest on the vessel wall. The statistical data for this region is as follows:

| Parameter | Value               |
|-----------|---------------------|
| Area      | 4.06mm <sup>2</sup> |
| Mean      | 121.61              |
| Std.Dev.  | 149.20              |



R

Area: 4.06mm<sup>2</sup>  
Mean: 76.84  
Std.Dev.: 181.44

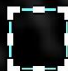

R

Area: 4.06mm<sup>2</sup>  
Mean: 73.74  
Std.Dev.: 211.09

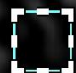

CT Axial: 21.66

R

Area: 4.06mm<sup>2</sup>  
Mean: 293.57  
Std.Dev.: 154.48

CT Axial: 20.50

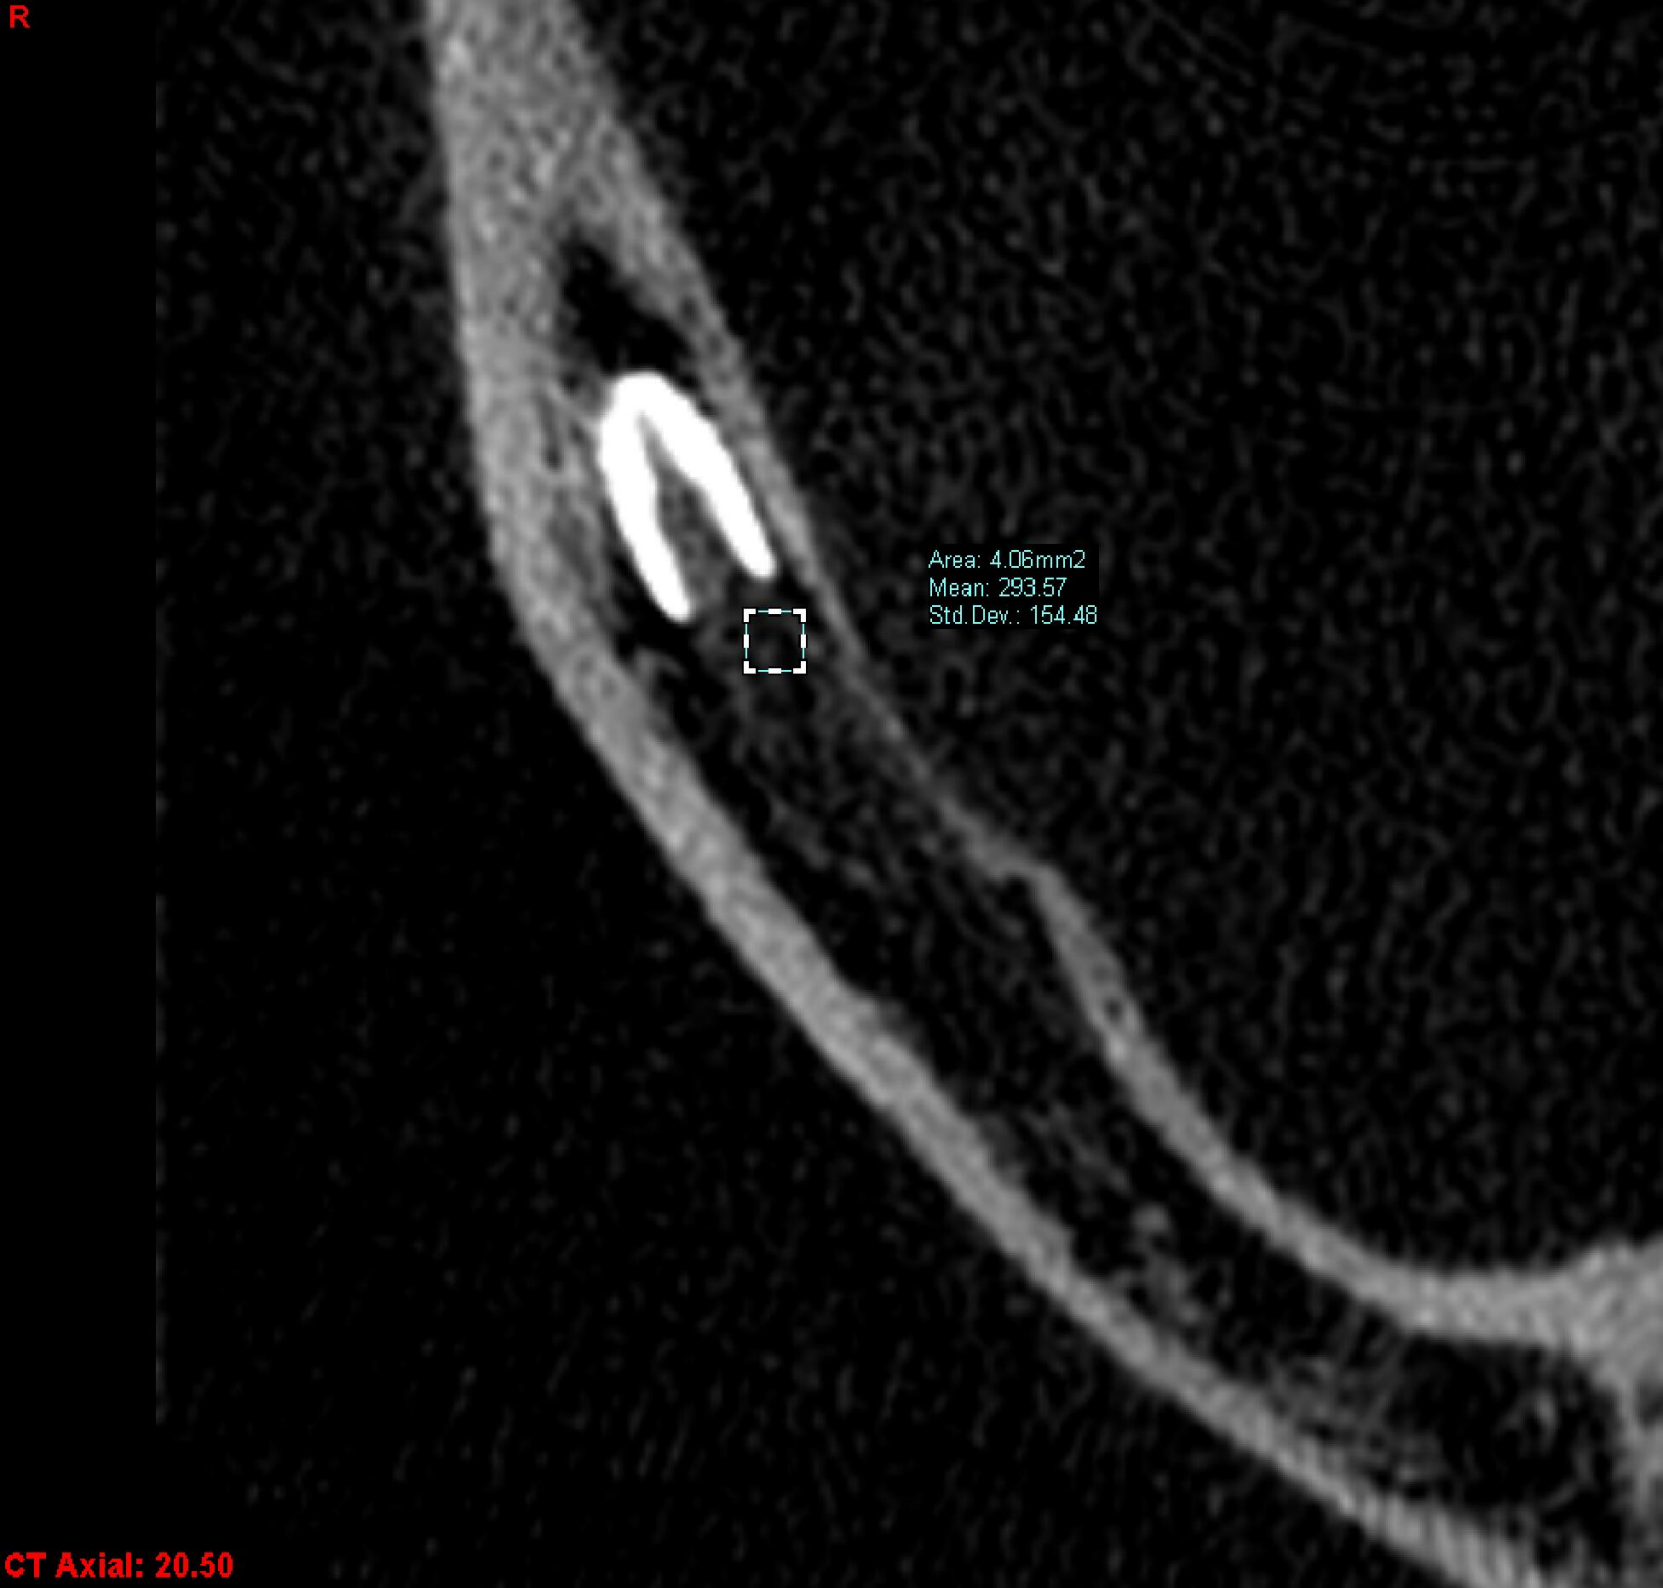

R

Area: 4.06mm<sup>2</sup>  
Mean: 329.45  
Std.Dev.: 158.56

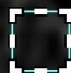

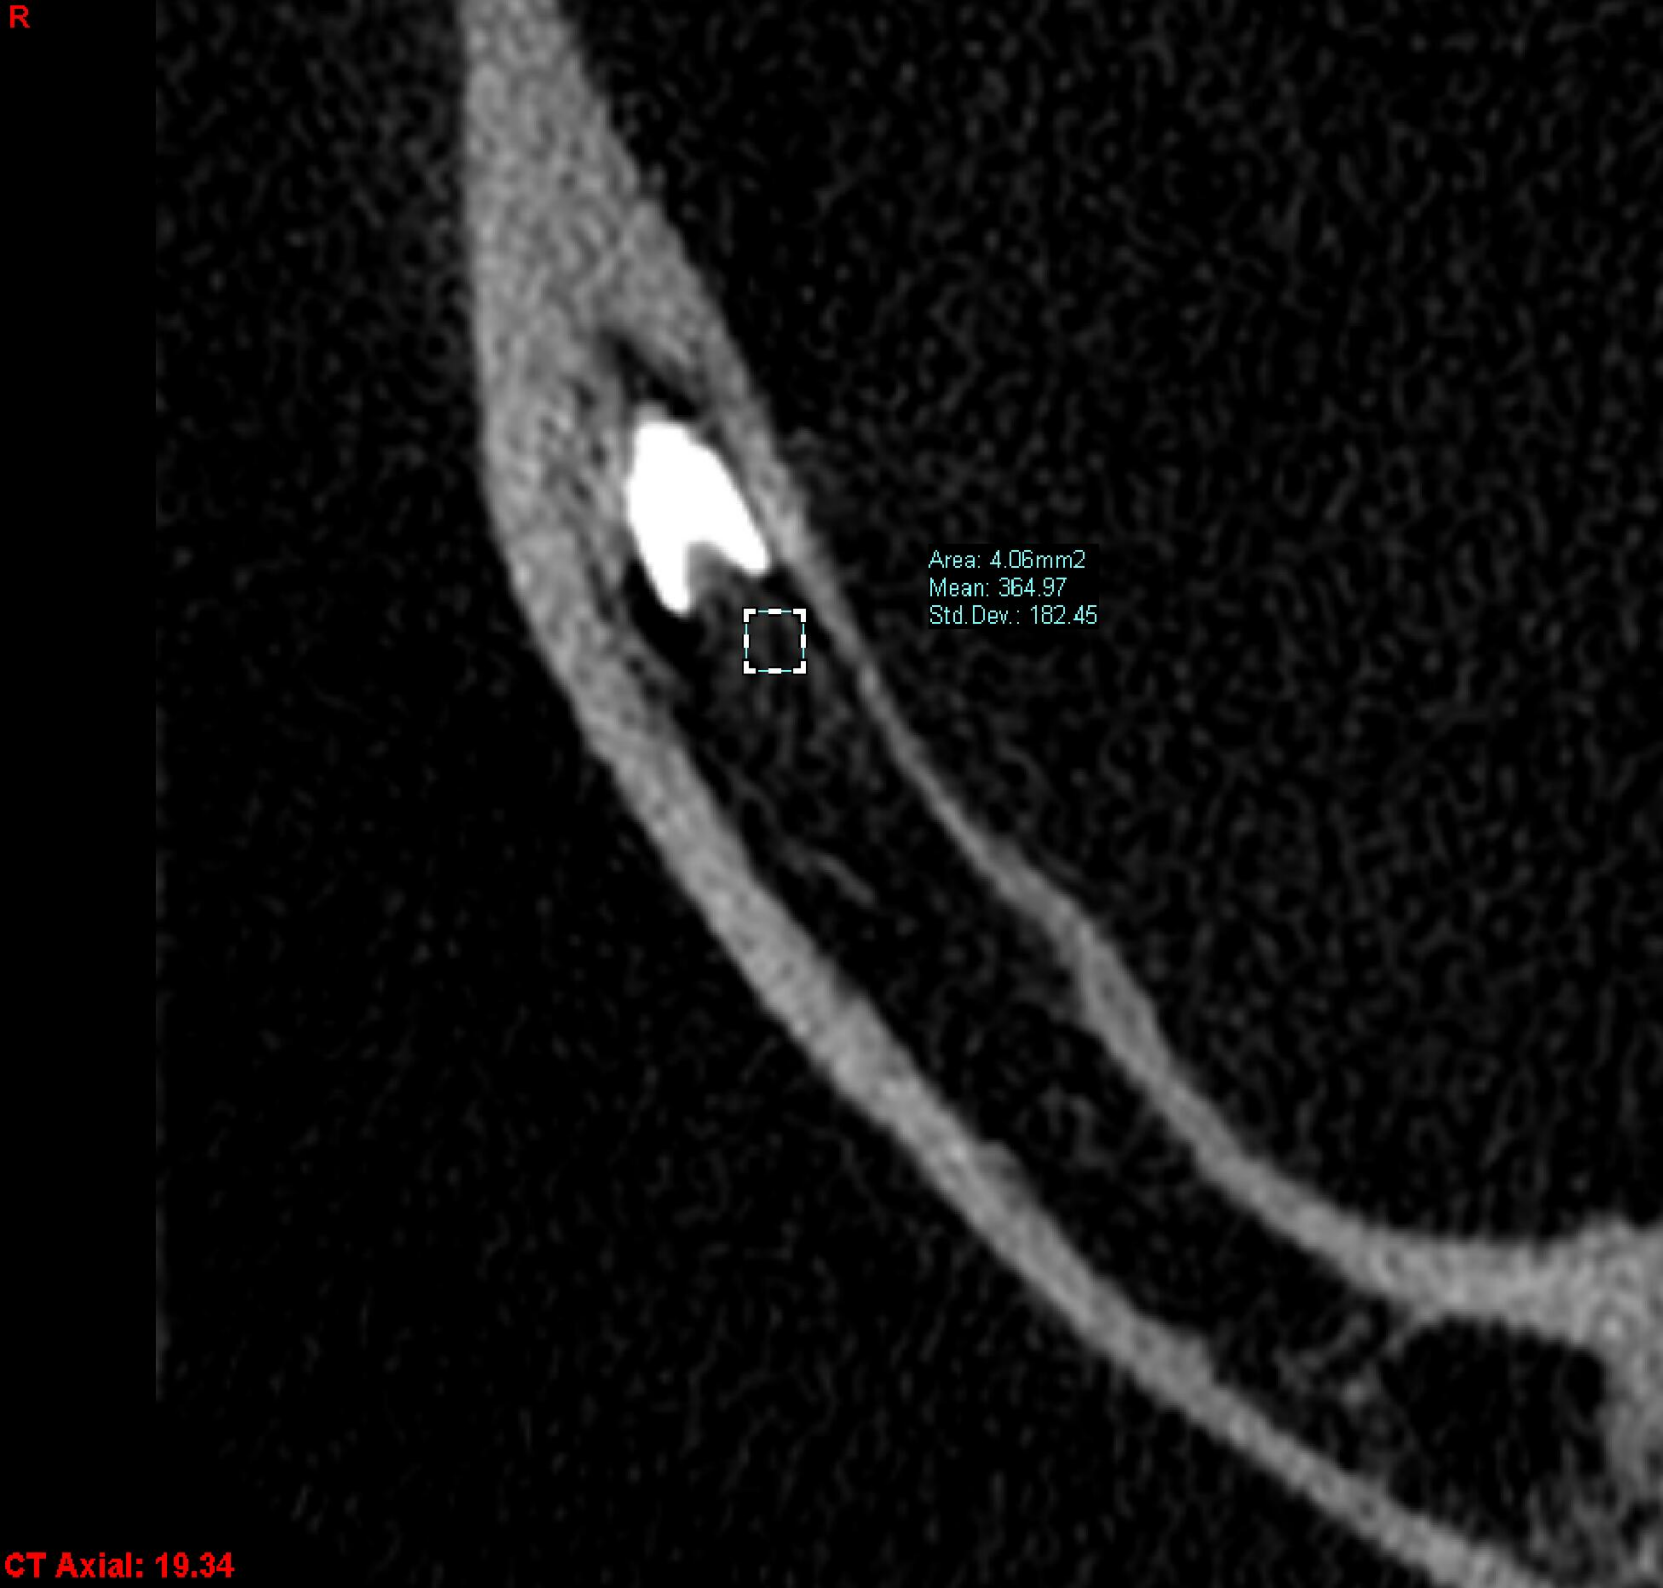

Area: 4.06mm<sup>2</sup>  
Mean: 364.97  
Std.Dev.: 182.45

R

Area: 4.06mm<sup>2</sup>  
Mean: 390.24  
Std.Dev.: 220.51

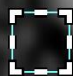

**Bone density of the examined area**

| <b>Bone height (mm)</b> | <b>Area of examination (mm<sup>2</sup>)</b> | <b>Relative Bone Density (HU)</b> | <b>St. deviation</b> | <b>Notes:</b>                        |
|-------------------------|---------------------------------------------|-----------------------------------|----------------------|--------------------------------------|
| 1                       | 4.06                                        | 481.18                            | 298.16               | Top of the alveolar ridge            |
| 2                       | 4.06                                        | 304.75                            | 199.95               |                                      |
| 3                       | 4.06                                        | 293.74                            | 160.52               |                                      |
| 4                       | 4.06                                        | 282.49                            | 170.59               |                                      |
| 5                       | 4.06                                        | 275.01                            | 129.77               |                                      |
| 6                       | 4.06                                        | 271.44                            | 107.22               |                                      |
| 7                       | 4.06                                        | 263.45                            | 117.16               |                                      |
| 8                       | 4.06                                        | 265.76                            | 136.32               |                                      |
| 9                       | 4.06                                        | 257.95                            | 111.24               |                                      |
| 10                      | 4.06                                        | 230.25                            | 125.95               |                                      |
| 11                      | 4.06                                        | 224.26                            | 153.15               |                                      |
| 12                      | 4.06                                        | 216.37                            | 138.34               |                                      |
| 13                      | 4.06                                        | 245.52                            | 170.73               | Upper border of the mandibular canal |
| 14                      | 4.06                                        | 121.61                            | 149.2                |                                      |
| 15                      | 4.06                                        | 73.74                             | 211.09               |                                      |
| 16                      | 4.06                                        | 293.57                            | 151.48               | Lower border of the mandibular canal |
